# Supplementary material for: Exploration of octahedrally shaped MnCo2O4 catalyst particles for visible light driven photocatalytic water splitting reaction
Source: Royal Society of Chemistry journal article supplement (doi:10.1039/c4ra12646g), 2015-01-01
Supplement: c4ra12646g1.pdf [file c4ra12646g1.pdf]

## Supporting information

### Exploration of octahedrally shaped $\text{MnCo}_2\text{O}_4$ catalyst particles for visible light driven photo catalytic water splitting reaction

S. M. A. Shibli,<sup>\*a</sup> P. S. Arun<sup>a</sup>, Anupama V. Raj<sup>a</sup>

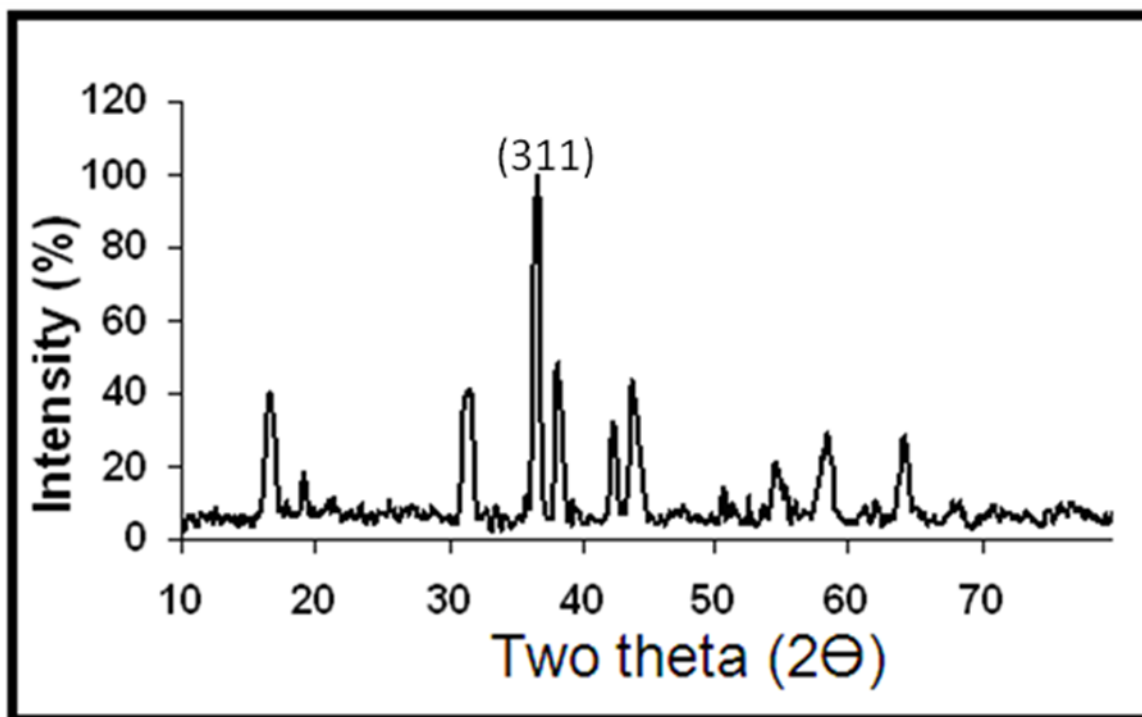

**Fig.1** XRD pattern of unsupported  $\text{MnCo}_2\text{O}_4$  catalyst evidenced the formation of  $\text{MnCo}_2\text{O}_4$  catalyst

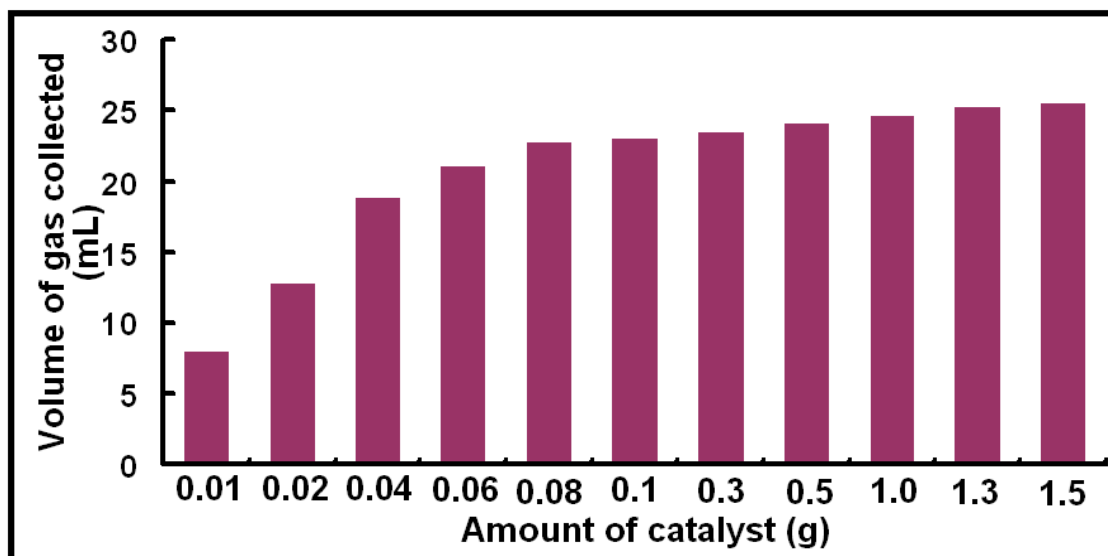

**Fig. 2** The variation of photo catalytic water splitting efficiency with respect to amount of  $\text{MnCo}_2\text{O}_4$  catalyst

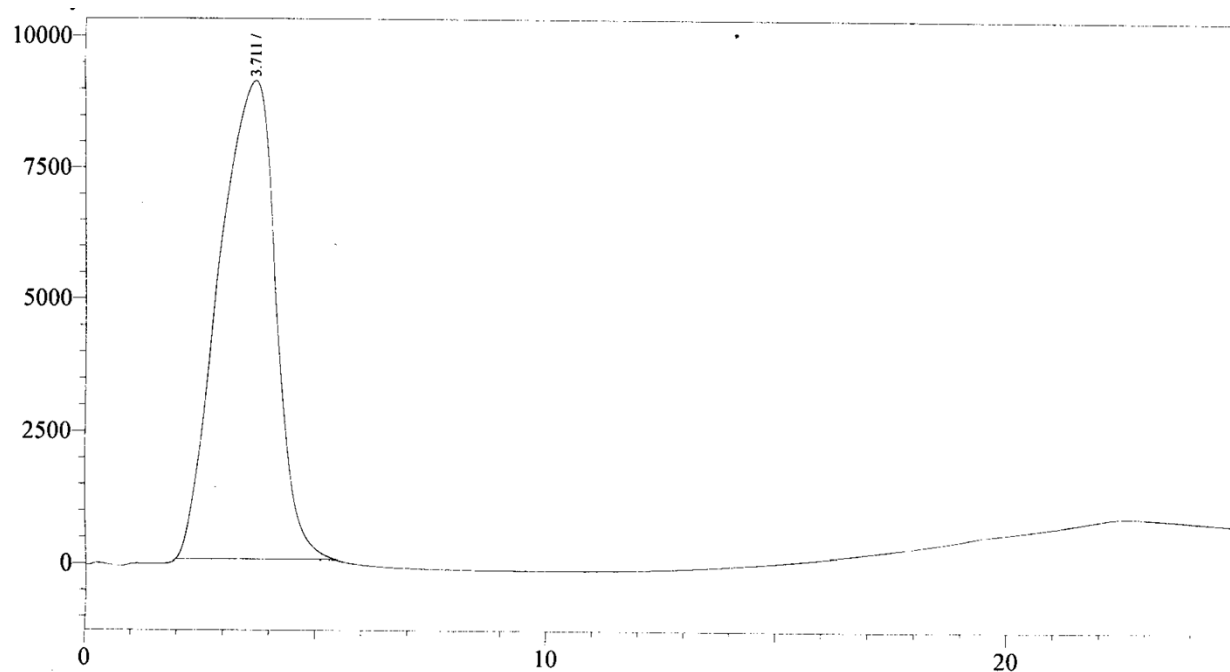

**Fig. 3** GC spectra(injection method) evidenced the extra purity of hydrogen evolved during visible light driven water splitting process in presence of methanol

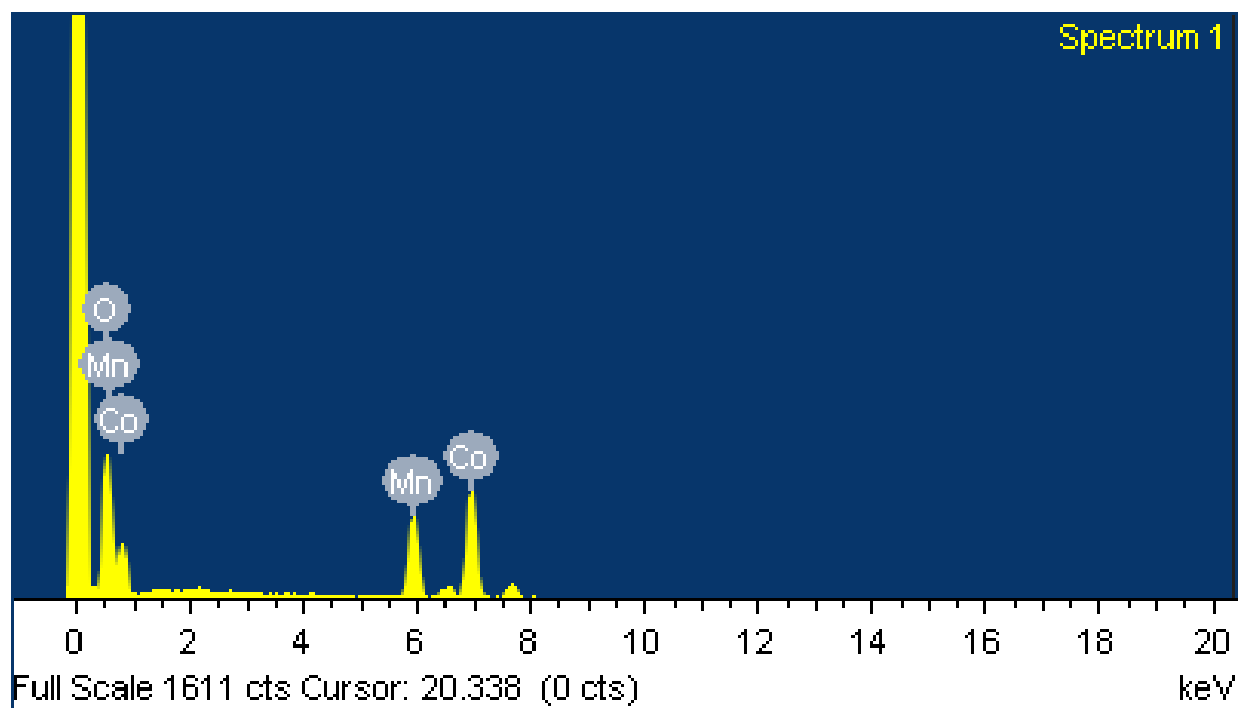

**Fig. 4** EDAX spectral pattern of  $\text{MnCo}_2\text{O}_4$  crystals
